# Supplementary material for: Development and Validation of Web-Based Nomograms to Precisely Predict Survival Outcomes of Non-metastatic Nasopharyngeal Carcinoma in an Endemic Area
Source: PubMed Central journal article supplement — Cancer Res Treat. 2020 Dec 7;53(3):657–70. doi: 10.4143/crt.2020.899 (PMC8291181; doi:10.4143/crt.2020.899), 2020-12-07
Supplement: crt-2020-899_S3Fig.pdf [file crt-2020-899_S3Fig.pdf]

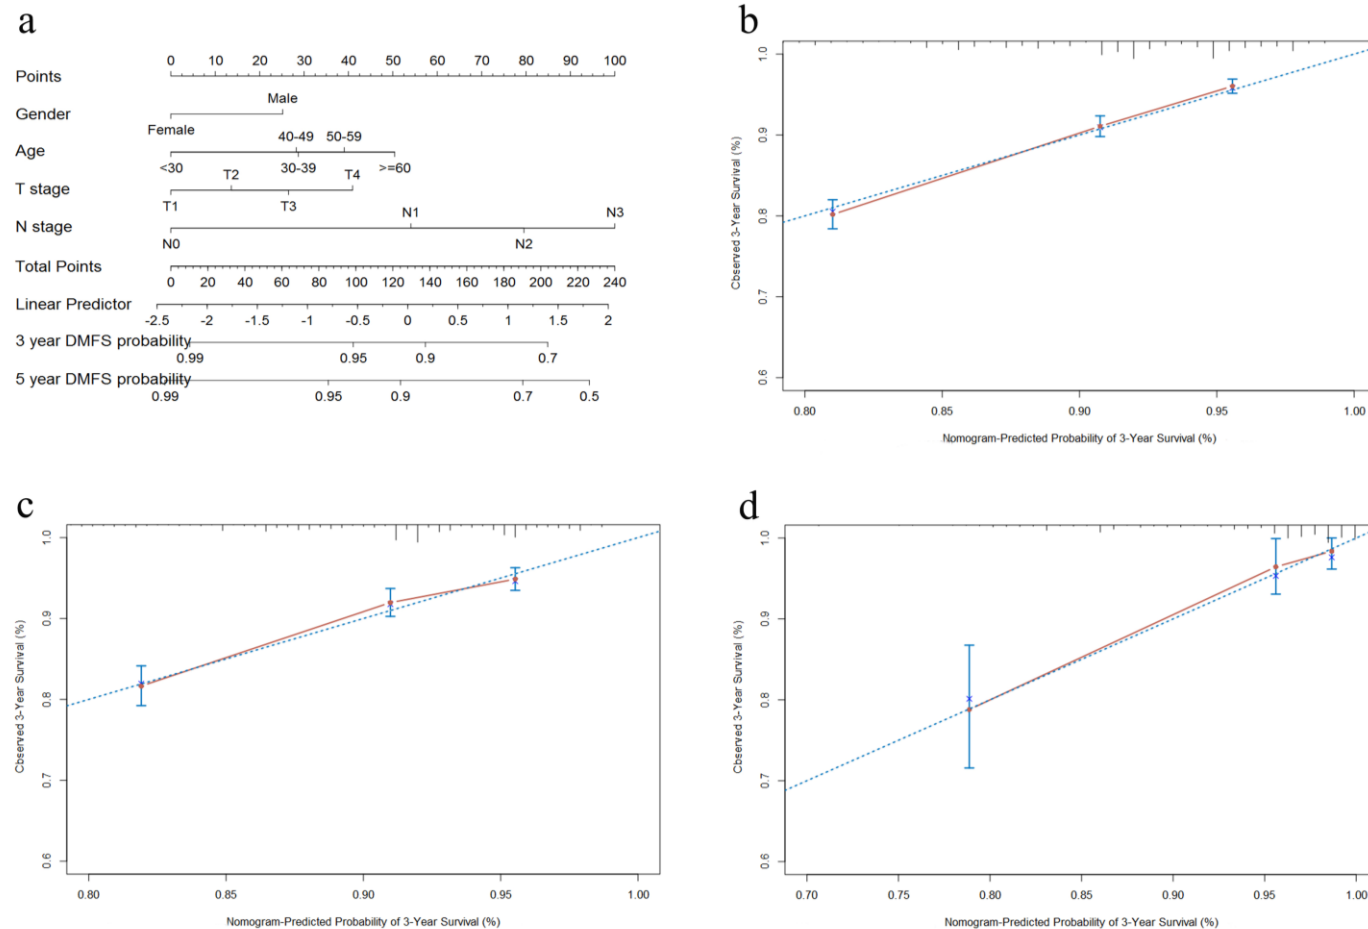

**S3 Fig.** (A) Nomogram for 3- and 5-year distant metastasis-free survival (DMFS) in nasopharyngeal carcinoma patients. Calibration curve of nomogram for predicting 3-year DMFS for the training cohort (B), internal validation cohort (C), and external validation cohort (D). Actual DMFS plotted on the y-axis; nomogram predicted probability of DMFS plotted on the x-axis.
