# Supplementary material for: Development and Validation of Web-Based Nomograms to Precisely Predict Survival Outcomes of Non-metastatic Nasopharyngeal Carcinoma in an Endemic Area
Source: PubMed Central journal article supplement — Cancer Res Treat. 2020 Dec 7;53(3):657–70. doi: 10.4143/crt.2020.899 (PMC8291181; doi:10.4143/crt.2020.899), 2020-12-07
Supplement: crt-2020-899_S7Fig.pdf [file crt-2020-899_S7Fig.pdf]

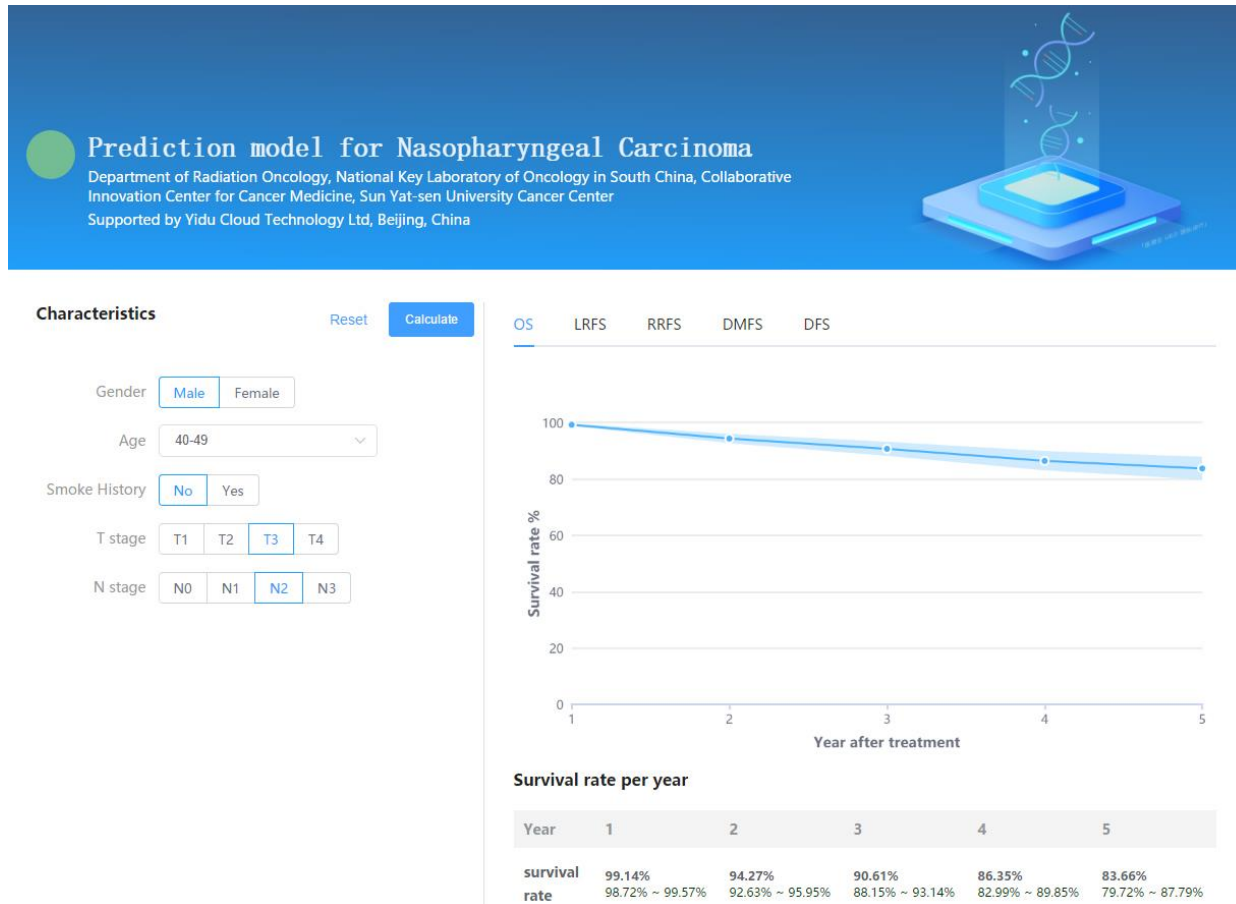

**S7 Fig.** Print screen from the web-based nomograms, predicting overall survival; local relapse-free survival, regional relapse-free survival, distant metastasis-free survival, and disease-free survival in a fictional patient. The nomograms are available at <https://modelstore.yiduccloud.com.cn/#/?lang=en>. Choose or enter the value for each variable, and then press the “Calculate” button.
